# Supplementary material for: Photoreactivity of Hair Melanin from Different Skin Phototypes—Contribution of Melanin Subunits to the Pigments Photoreactive Properties
Source: MDPI journal article supplement (doi:10.3390/ijms22094465), 2021-04-24
Supplement: s1 [file s1]

## Supplementary material for:

### Photoreactivity of hair melanin from different skin phototypes – contribution of melanin subunits to the pigments photoreactive properties

**Table S1.** Chemical analysis of isolated pigments. Numerical values of the ratios of examined markers for melanosomes and melanin nanoaggregates of the studied melanins. Data represent mean  $\pm$  SEM.

| Melanosomes | A650/A500<br>$\times 10$ | PTCA/A500<br>( $\mu\text{g}$ ) | AHPs/A500<br>( $\mu\text{g}$ ) | TTCA/A500<br>( $\mu\text{g}$ ) |
|-------------|--------------------------|--------------------------------|--------------------------------|--------------------------------|
| Red         | $1.79 \pm 0.21$          | $0.47 \pm 0.17$                | $1.67 \pm 0.97$                | $1.67 \pm 0.27$                |
| Blond       | $2.48 \pm 0.48$          | $0.94 \pm 0.13$                | $0.66 \pm 0.64$                | $0.81 \pm 0.61$                |
| Chestnut    | $2.85 \pm 0.13$          | $1.04 \pm 0.12$                | $0.03 \pm 0.02$                | $0.25 \pm 0.08$                |
| Black       | $2.73 \pm 0.13$          | $1.29 \pm 0.25$                | $0.02 \pm 0.004$               | $0.12 \pm 0.03$                |

**Table S2.** Chemical analysis of isolated pigments. Numerical values of the ratios of examined markers for melanosomes and melanin nanoaggregates of the studied melanins. Data represent mean  $\pm$  SEM.

| Melanin nanoaggregates | A650/A500<br>$\times 10$ | PTCA/A500<br>( $\mu\text{g}$ ) | AHPs/A500<br>( $\mu\text{g}$ ) | TTCA/A500<br>( $\mu\text{g}$ ) |
|------------------------|--------------------------|--------------------------------|--------------------------------|--------------------------------|
| Red                    | $0.93 \pm 0.15$          | $0.18 \pm 0.05$                | $2.08 \pm 0.95$                | $1.15 \pm 0.61$                |
| Blond                  | $0.65 \pm 0.17$          | $0.20 \pm 0.11$                | $0.73 \pm 0.13$                | $0.81 \pm 0.20$                |
| Chestnut               | $0.90 \pm 0.30$          | $0.86 \pm 0.08$                | $0.84 \pm 0.46$                | $0.15 \pm 0.11$                |
| Black                  | $3.09 \pm 0.02$          | $0.34 \pm 0.01$                | $0.01 \pm 0.002$               | $0.04 \pm 0.005$               |

**Table S3.** Chemical analysis of isolated pigments. Numerical values of the ratios of examined markers for melanosomes of the studied melanins. Data represent mean  $\pm$  SEM.

| Melanosomes | PTCA/PDCA        | TTCA/4-AHP        | 4-AHP/3-AHP<br>$\times 10$ | AHPs/PTCA<br>$\times 10$ | TTCA/PTCA<br>$\times 10$ |
|-------------|------------------|-------------------|----------------------------|--------------------------|--------------------------|
| Red         | $3.31 \pm 1.60$  | $2.98 \pm 1.22$   | $10.46 \pm 2.72$           | $52.00 \pm 22.50$        | $51.61 \pm 23.80$        |
| Blond       | $13.12 \pm 9.67$ | $12.00 \pm 16.76$ | $6.54 \pm 2.96$            | $21.20 \pm 21.10$        | $23.76 \pm 22.50$        |
| Chestnut    | $11.12 \pm 0.50$ | $27.43 \pm 10.50$ | $9.32 \pm 5.71$            | $0.37 \pm 0.17$          | $2.38 \pm 0.54$          |
| Black       | $24.37 \pm 7.38$ | $29.66 \pm 14.60$ | $6.74 \pm 1.39$            | $0.13 \pm 0.04$          | $1.05 \pm 0.37$          |

**Table S4.** Chemical analysis of isolated pigments. Numerical values of the ratios of examined markers for melanosomes of the studied melanins. Data represent mean  $\pm$  SEM.

| Melanin<br>Nanoaggregates | PTCA/PDCA       | TTCA/4-AHP      | 4-AHP/3-AHP<br>$\times 10$ | AHPs/PTCA<br>$\times 10$ | TTCA/PTCA<br>$\times 10$ |
|---------------------------|-----------------|-----------------|----------------------------|--------------------------|--------------------------|
| Red                       | $1.19 \pm 0.16$ | $1.66 \pm 0.68$ | $0.72 \pm 0.20$            | $10.42 \pm 2.48$         | $5.54 \pm 1.45$          |
| Blond                     | $0.79 \pm 0.17$ | $3.07 \pm 0.70$ | $0.61 \pm 0.12$            | $9.48 \pm 6.16$          | $9.64 \pm 5.56$          |
| Chestnut                  | $3.84 \pm 0.82$ | $0.59 \pm 0.48$ | $1.08 \pm 0.64$            | $1.04 \pm 0.62$          | $0.17 \pm 0.11$          |
| Black                     | $1.44 \pm 0.44$ | $5.38 \pm 0.01$ | $1.19 \pm 0.06$            | $0.04 \pm 0.01$          | $0.11 \pm 0.02$          |

**Table S5.** Values of initial intensities of oxygen consumption for melanosomes and melanin nanoaggregates from different hair samples. Data represent mean  $\pm$  s.d.

| Type of hair<br>melanin | Melanosomes                      |                                  | Nanoaggregates                   |                                  |
|-------------------------|----------------------------------|----------------------------------|----------------------------------|----------------------------------|
|                         | 365 nm<br>(mM/s)                 | 445 nm<br>(mM/s)                 | 365 nm<br>(mM/s)                 | 365 nm<br>(mM/s)                 |
| Red                     | $(5.20 \pm 0.41) \times 10^{-5}$ | $(8.59 \pm 0.72) \times 10^{-6}$ | $(4.90 \pm 0.34) \times 10^{-5}$ | $(1.20 \pm 0.05) \times 10^{-5}$ |
| Blond                   | $(8.07 \pm 0.70) \times 10^{-5}$ | $(1.73 \pm 0.12) \times 10^{-5}$ | $(8.19 \pm 0.71) \times 10^{-3}$ | $(9.20 \pm 0.84) \times 10^{-4}$ |
| Chestnut                | $(1.24 \pm 0.06) \times 10^{-4}$ | $(2.12 \pm 0.13) \times 10^{-5}$ | $(4.80 \pm 0.39) \times 10^{-3}$ | $(4.52 \pm 0.38) \times 10^{-4}$ |
| Black                   | $(3.48 \pm 0.21) \times 10^{-5}$ | $(6.10 \pm 0.43) \times 10^{-6}$ | $(3.20 \pm 0.26) \times 10^{-5}$ | $(7.21 \pm 0.58) \times 10^{-6}$ |

**Table S6.** Values of initial velocities of DMPO-OOH formation by melanosomes and melanin nanoaggregates from different hair samples. Data represent mean  $\pm$  s.d.

| Type of hair<br>melanin | Melanosomes                      |                                  | Nanoaggregates                   |                                  |
|-------------------------|----------------------------------|----------------------------------|----------------------------------|----------------------------------|
|                         | 365 nm<br>(a.u./s)               | 445 nm<br>(a.u./s)               | 365 nm<br>(a.u./s)               | 445 nm<br>(a.u./s)               |
| Red                     | $(7.40 \pm 0.40) \times 10^{-4}$ | $(7.96 \pm 0.57) \times 10^{-5}$ | $(4.58 \pm 0.28) \times 10^{-3}$ | $(9.84 \pm 0.69) \times 10^{-4}$ |
| Blond                   | $(8.23 \pm 0.56) \times 10^{-4}$ | $(2.60 \pm 0.16) \times 10^{-4}$ | $(6.95 \pm 0.38) \times 10^{-2}$ | $(7.71 \pm 0.55) \times 10^{-3}$ |
| Chestnut                | $(1.82 \pm 0.15) \times 10^{-3}$ | $(2.31 \pm 0.16) \times 10^{-4}$ | $(2.62 \pm 0.18) \times 10^{-2}$ | $(1.12 \pm 0.09) \times 10^{-3}$ |
| Black                   | $(4.90 \pm 0.34) \times 10^{-4}$ | $(6.65 \pm 0.50) \times 10^{-5}$ | $(3.37 \pm 0.27) \times 10^{-3}$ | $(7.22 \pm 0.36) \times 10^{-4}$ |

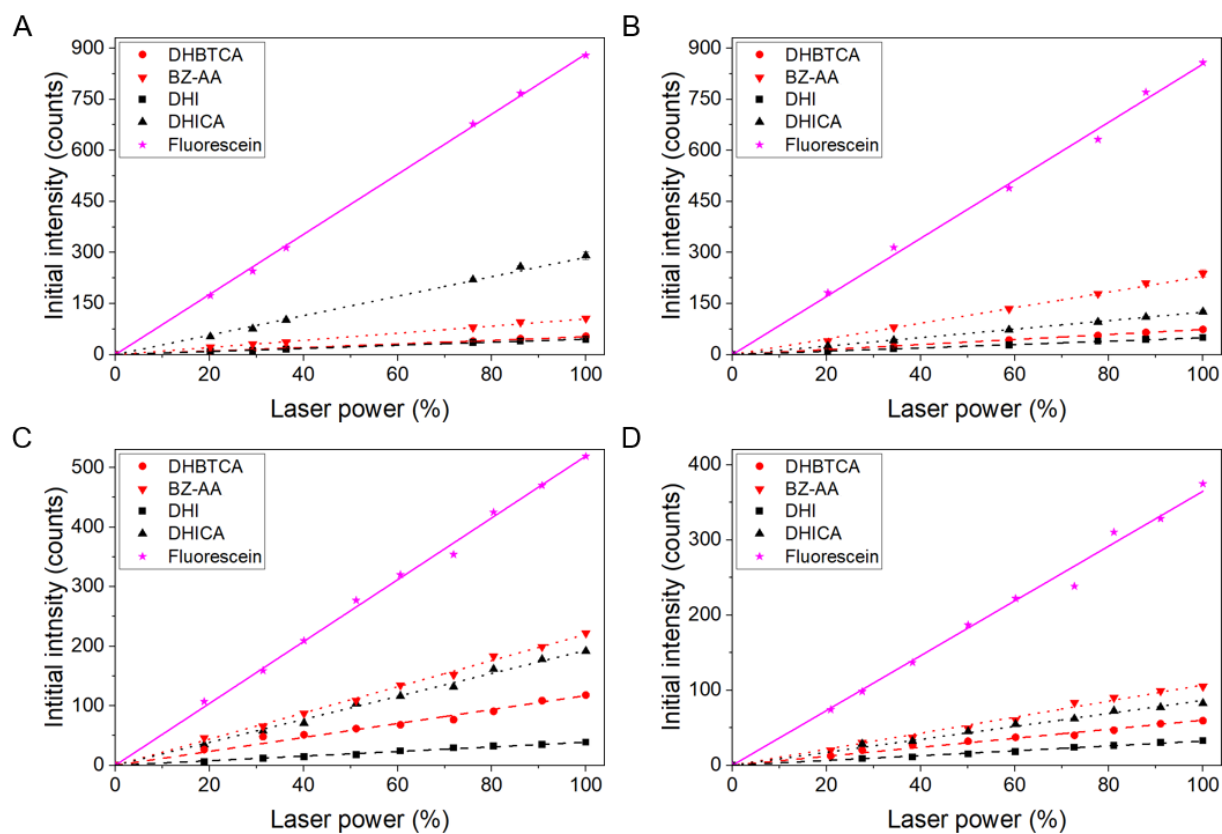

**Figure S1.** Determination of quantum yield of singlet oxygen photogeneration of melanin monomers at: 300 nm laser excitation (A), 332 nm laser excitation (B), 365 nm laser excitation (C) and 445 nm laser excitation (D). Magenta in A, B and D represents fluorescein as a reference sample, whereas magenta in C represent proflavine used as a standard.
